# Supplementary material
Source: publisher site journal article supplement (https://www.dovepress.com/article/568498)

Supplementary Figure 1:

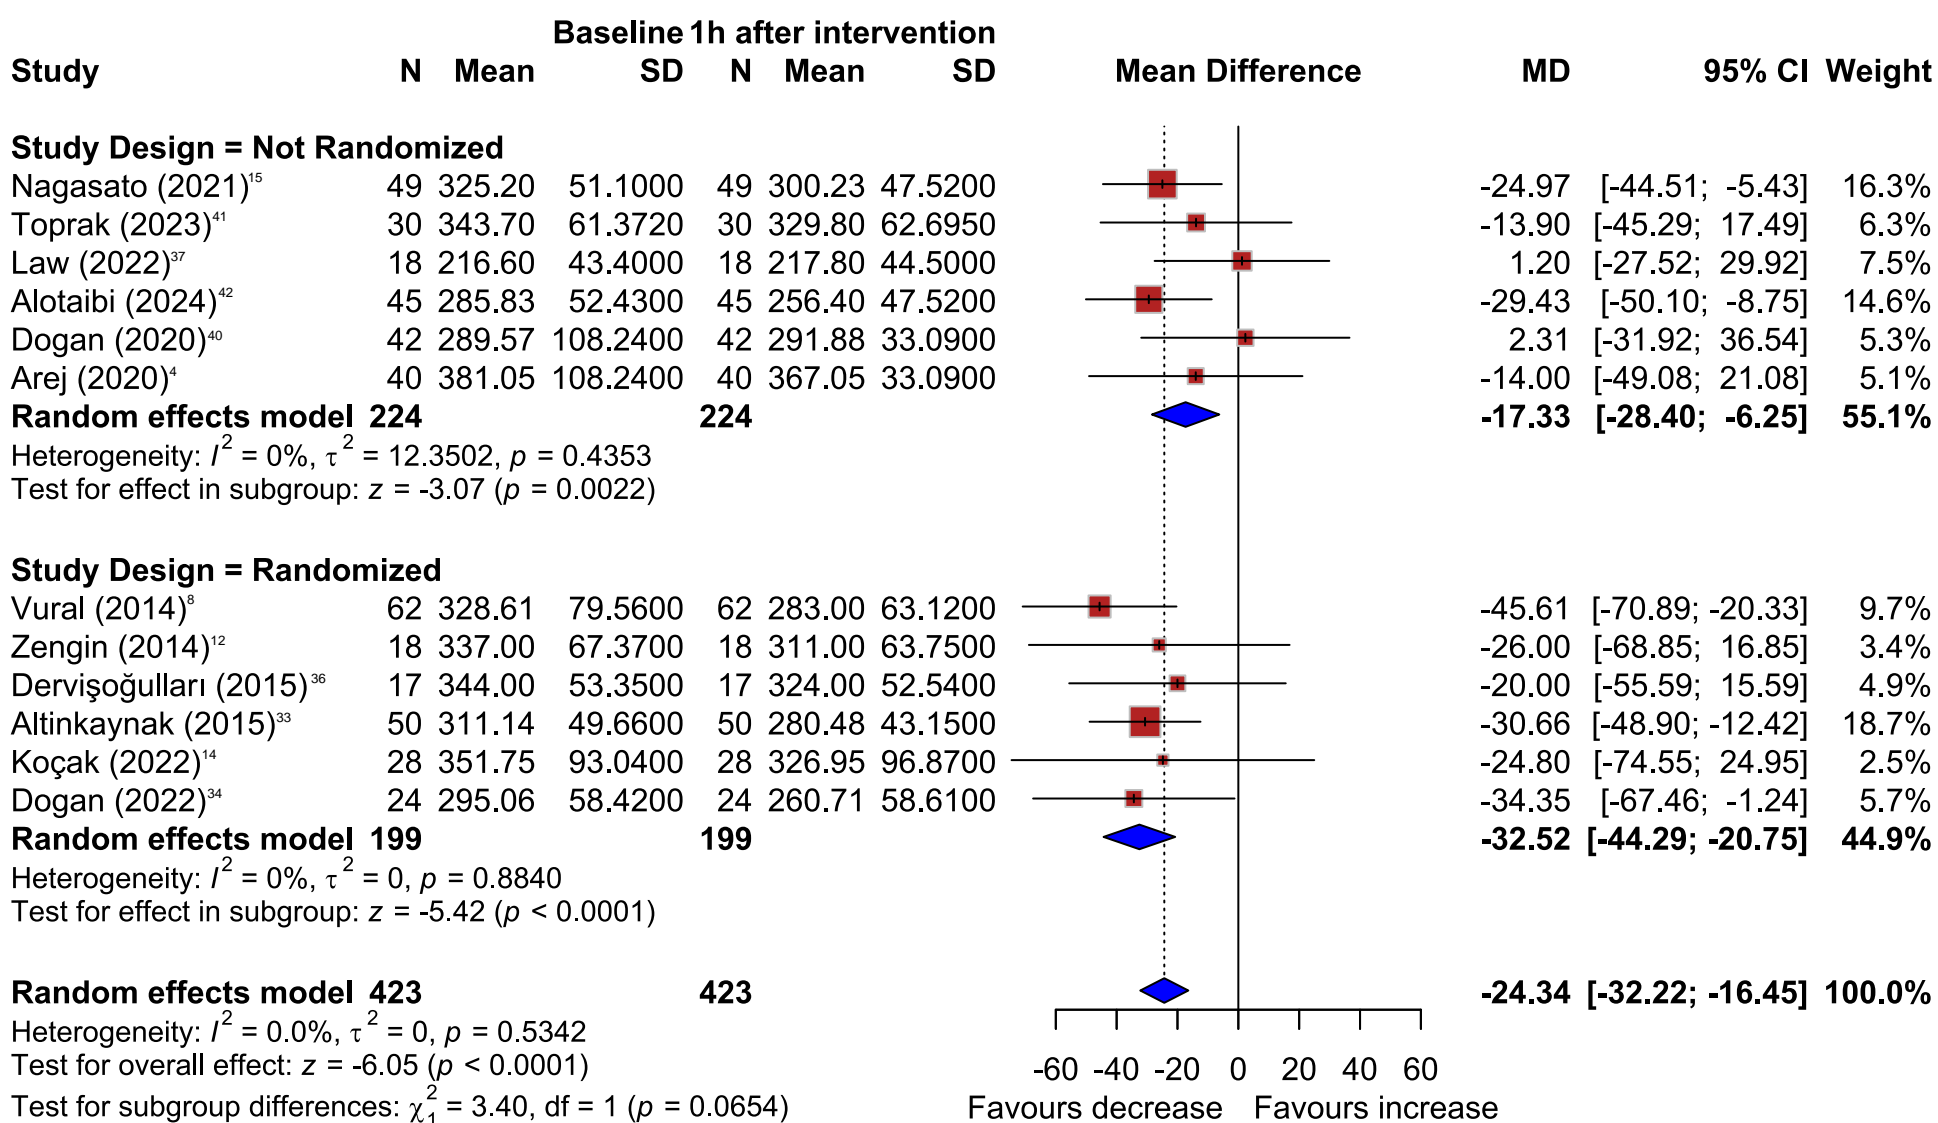

Supplementary Figure 2:

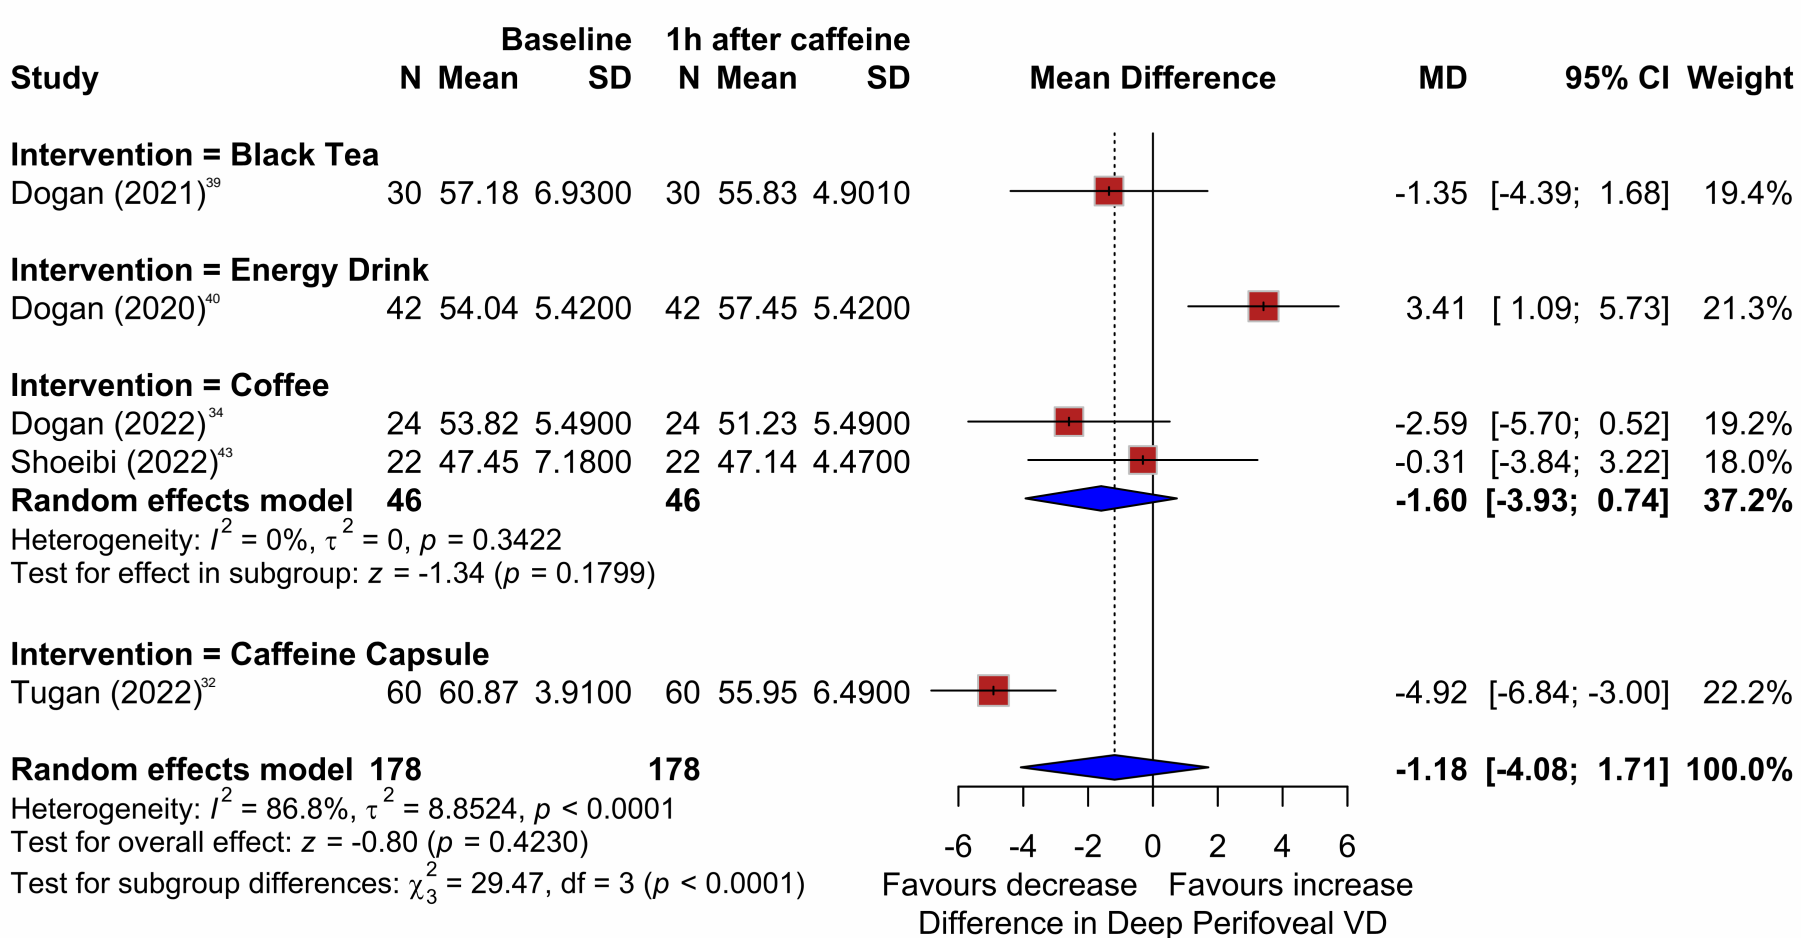

Supplementary Figure 3:

A.

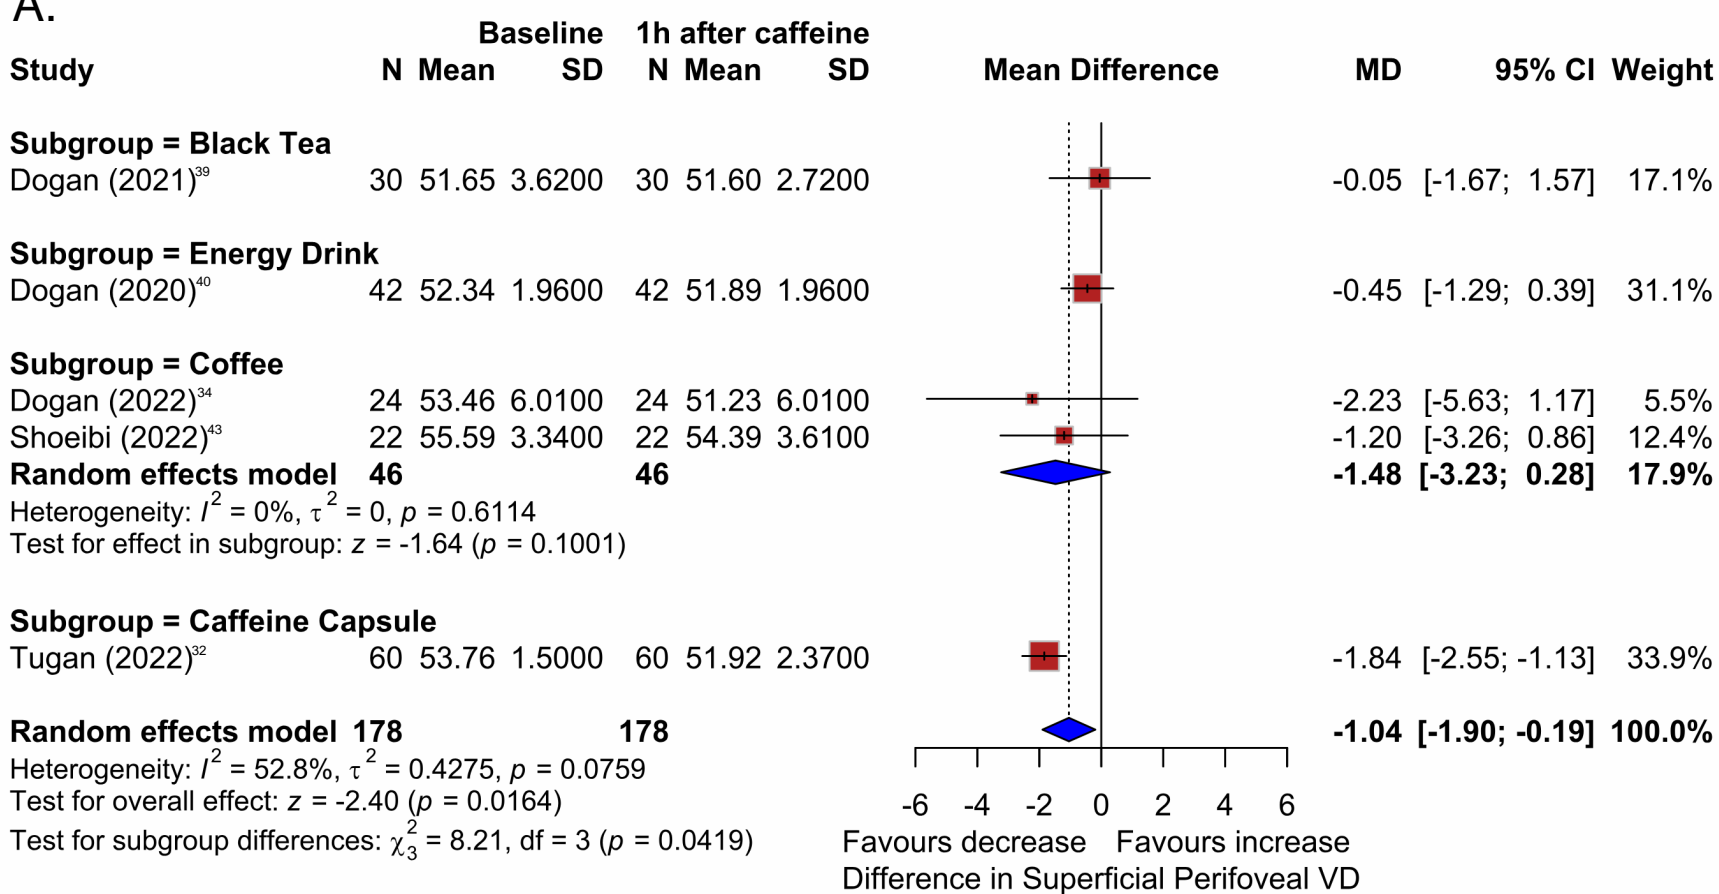

B.

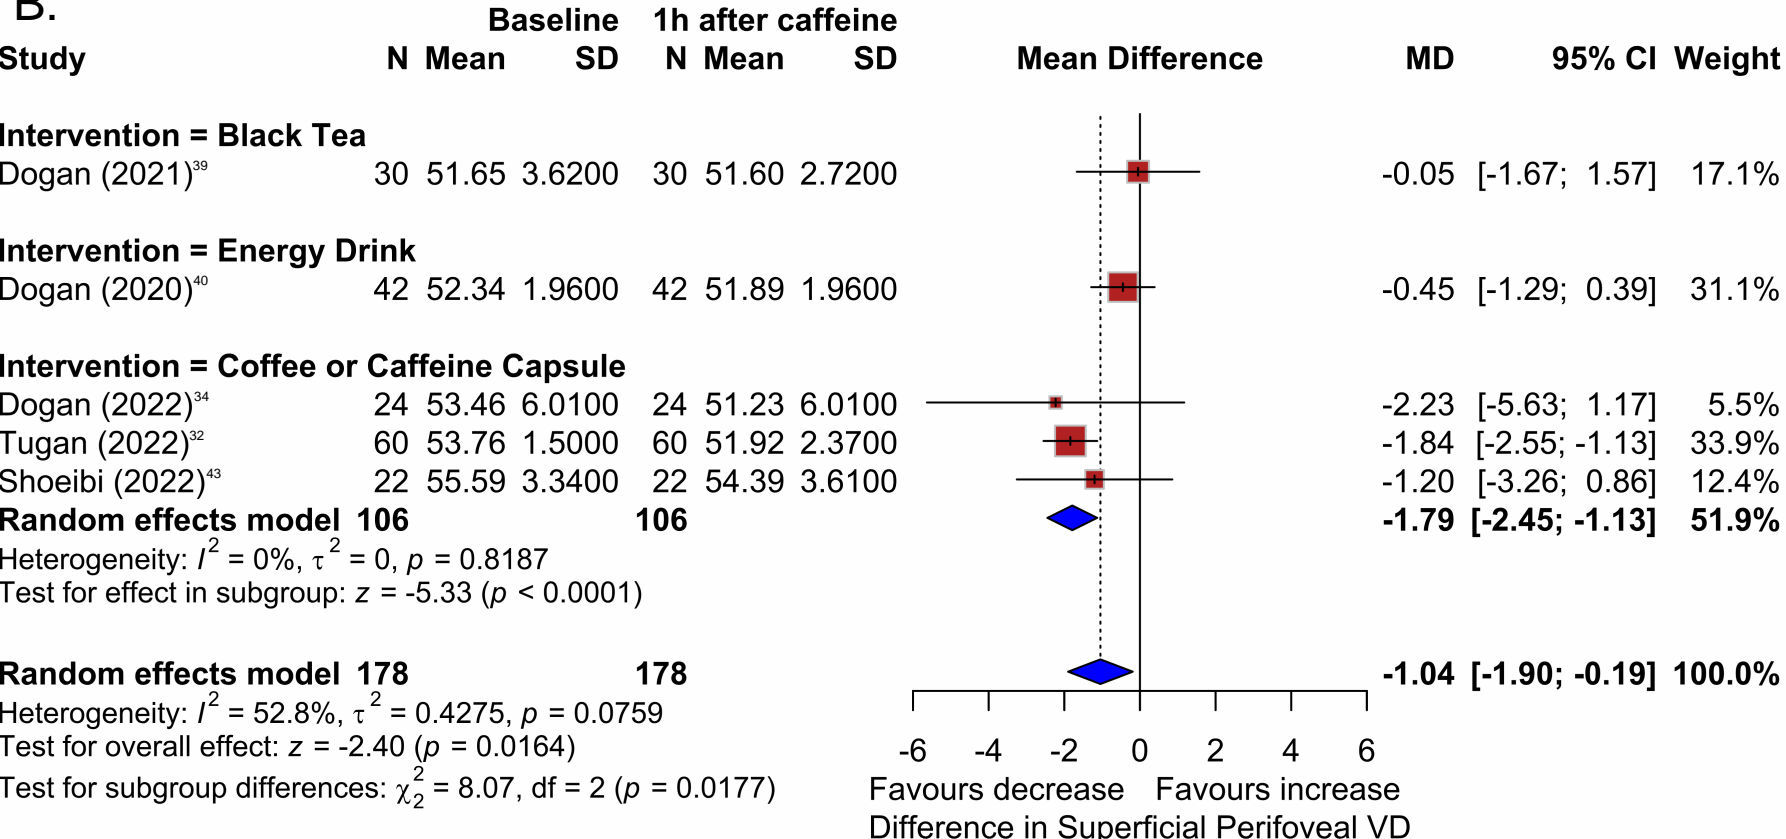

Supplement: Supplementary file 1 [file 568498%20Supplementary%20Material.pdf]
